**Yu LM et al: MRTF-A mediates LPS-induced pro-inflammatory transcription by interacting with the COMPASS complex**

Supplementary Figures: **3**

Supplementary Tables: **2**

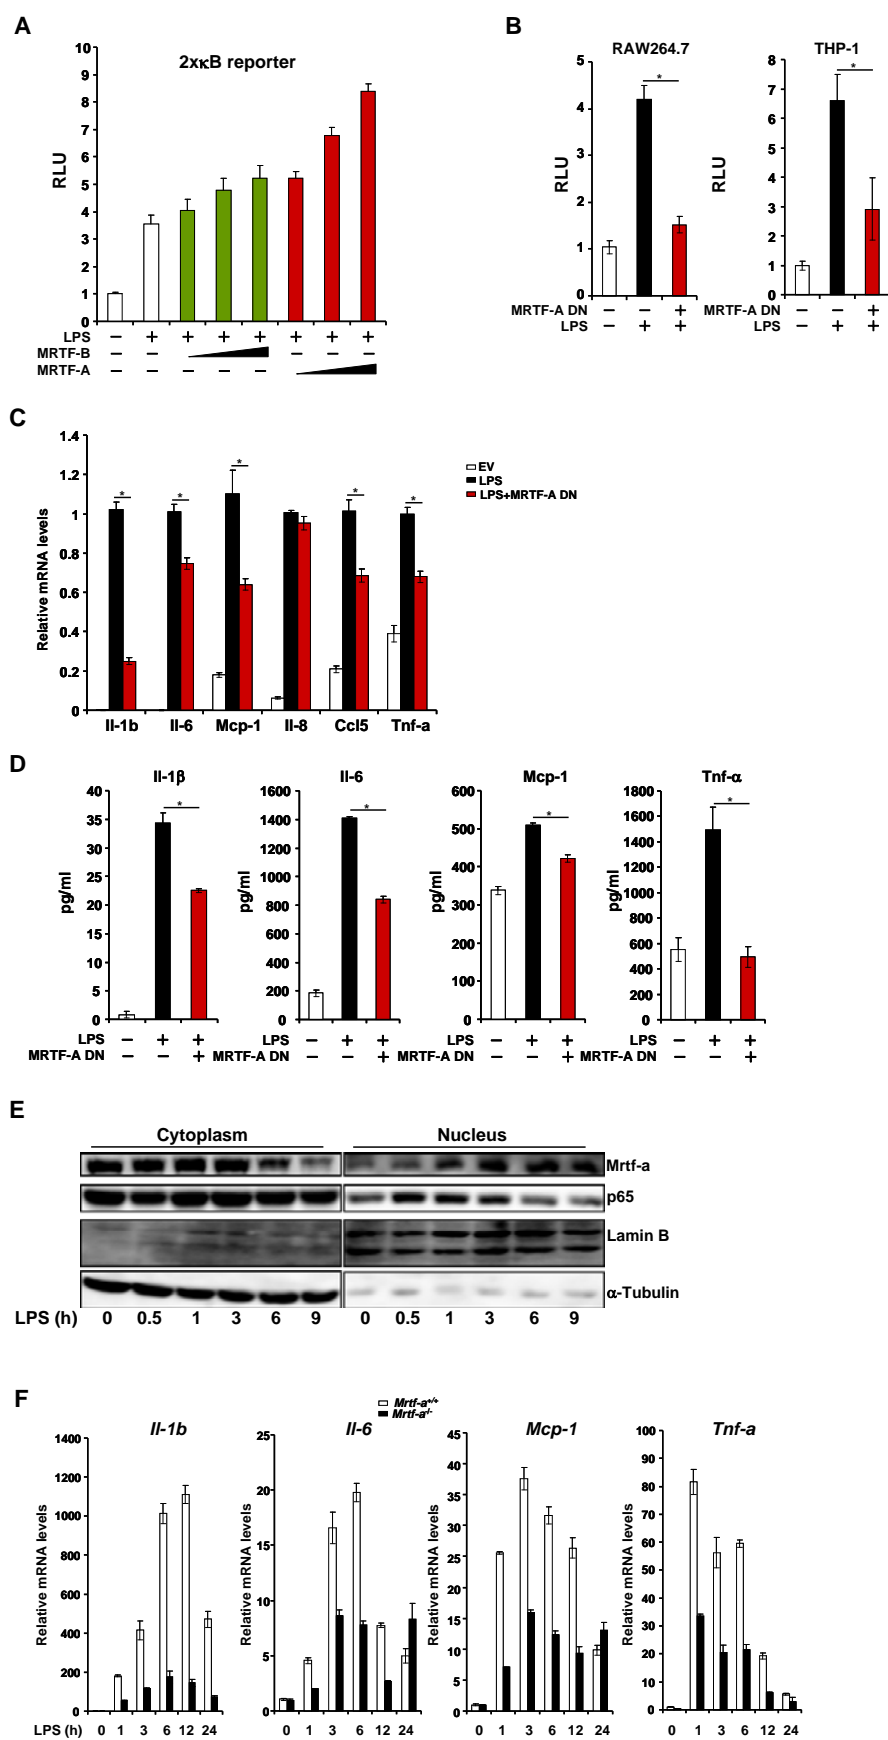

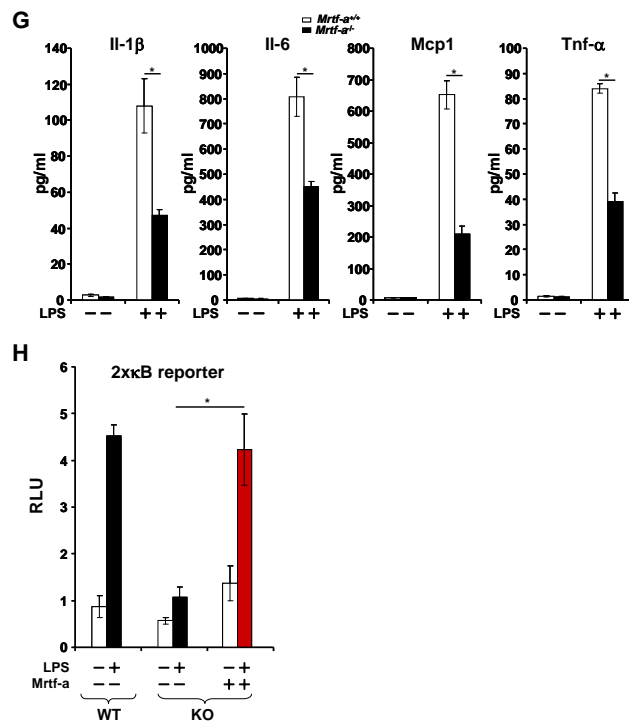

**Fig.S1:** (A) A 2κB reporter construct was transfected into RAW264.7 cells with or without MRTF-A/MRTF-B followed by treatment with LPS. Data are expressed RLU. (B) A 2κB reporter construct was transfected into RAW264.7 cells with or without dominant negative (DN) MRTF-A followed by treatment with LPS. Luciferase activities are expressed as RLU. (C, D) MRTF-A DN construct was transfected into RAW264.7 cells followed by treatment with LPS. Message RNA (C) and protein (D) levels of pro-inflammatory mediators were examined by qPCR and ELISA. (E) RAW264.7 cells were treated with LPS and harvested at indicated time points for cytoplasmic/nuclear fractionation. Western blotting was performed with indicated antibodies. (F, G) MEFs from wild type or MRTF-A deficient mice were treated with or without LPS for 3 hours. Message RNA (F) and protein (G) levels of pro-inflammatory mediators were examined by qPCR and ELISA. (H) A 2κB reporter construct was transfected into WT or MRTF-A KO MEF cells with or without MRTF-A followed by treatment with LPS. Data are expressed RLU. \*,  $p < .05$ . All quantitative data show the mean  $\pm$  S.D.

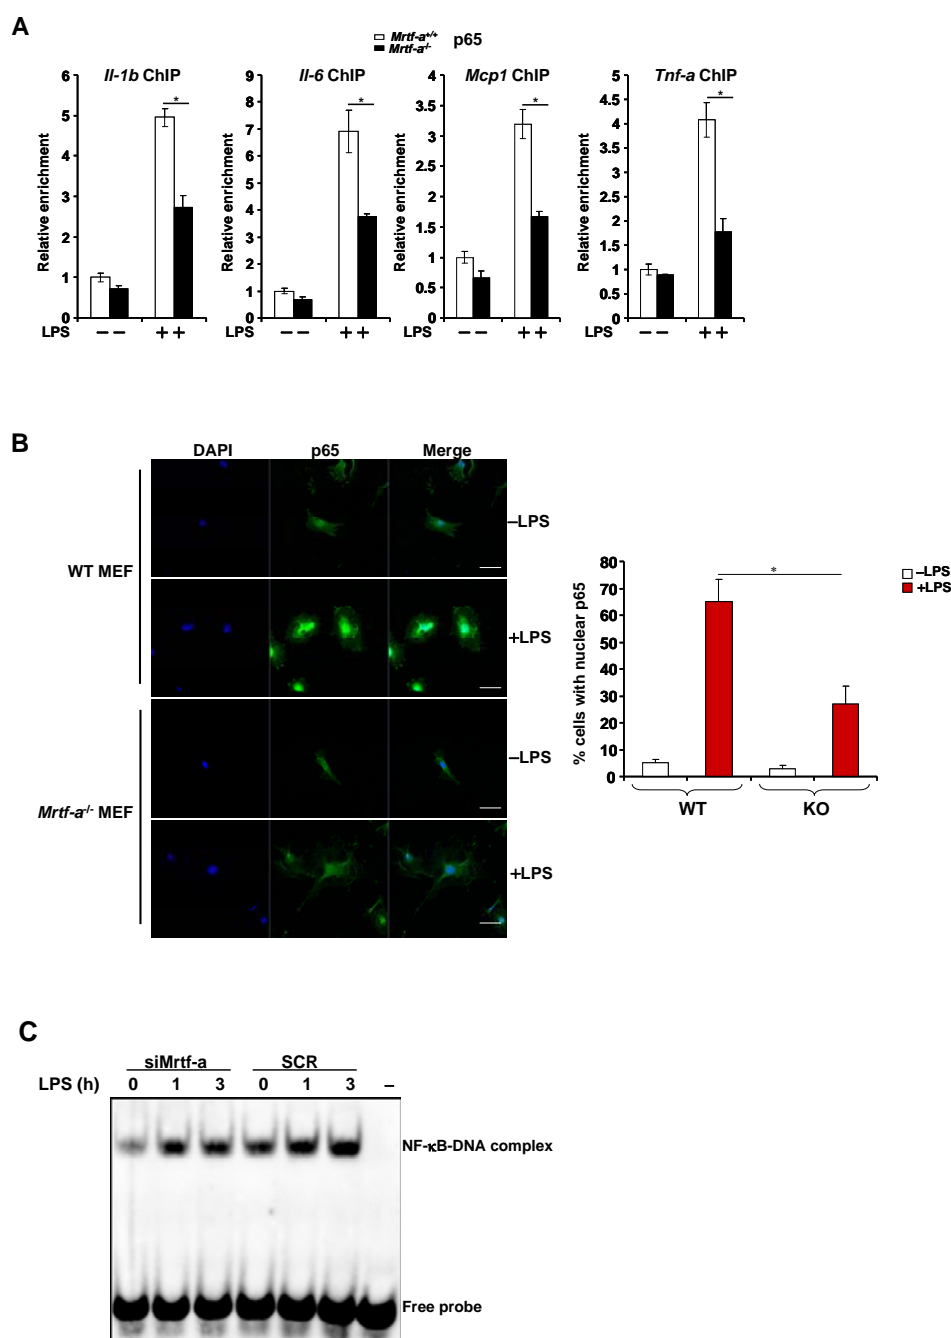

**Fig.S2:** (A) WT or MRTF-A KO MEF cells were treated with LPS for 3 hours and ChIP assay was performed with anti-p65. (B) WT or MRTF-A KO MEF cells were treated with LPS for 1 hour and immunofluorescence staining was performed with anti-p65. Scale bar, 20μm (C) RAW264.7 cells were transfected with indicated siRNAs followed by treatment with LPS. Gel shift assay was performed as described under *Methods*. \*,  $p < .05$ . All quantitative data show the mean  $\pm$  S.D.

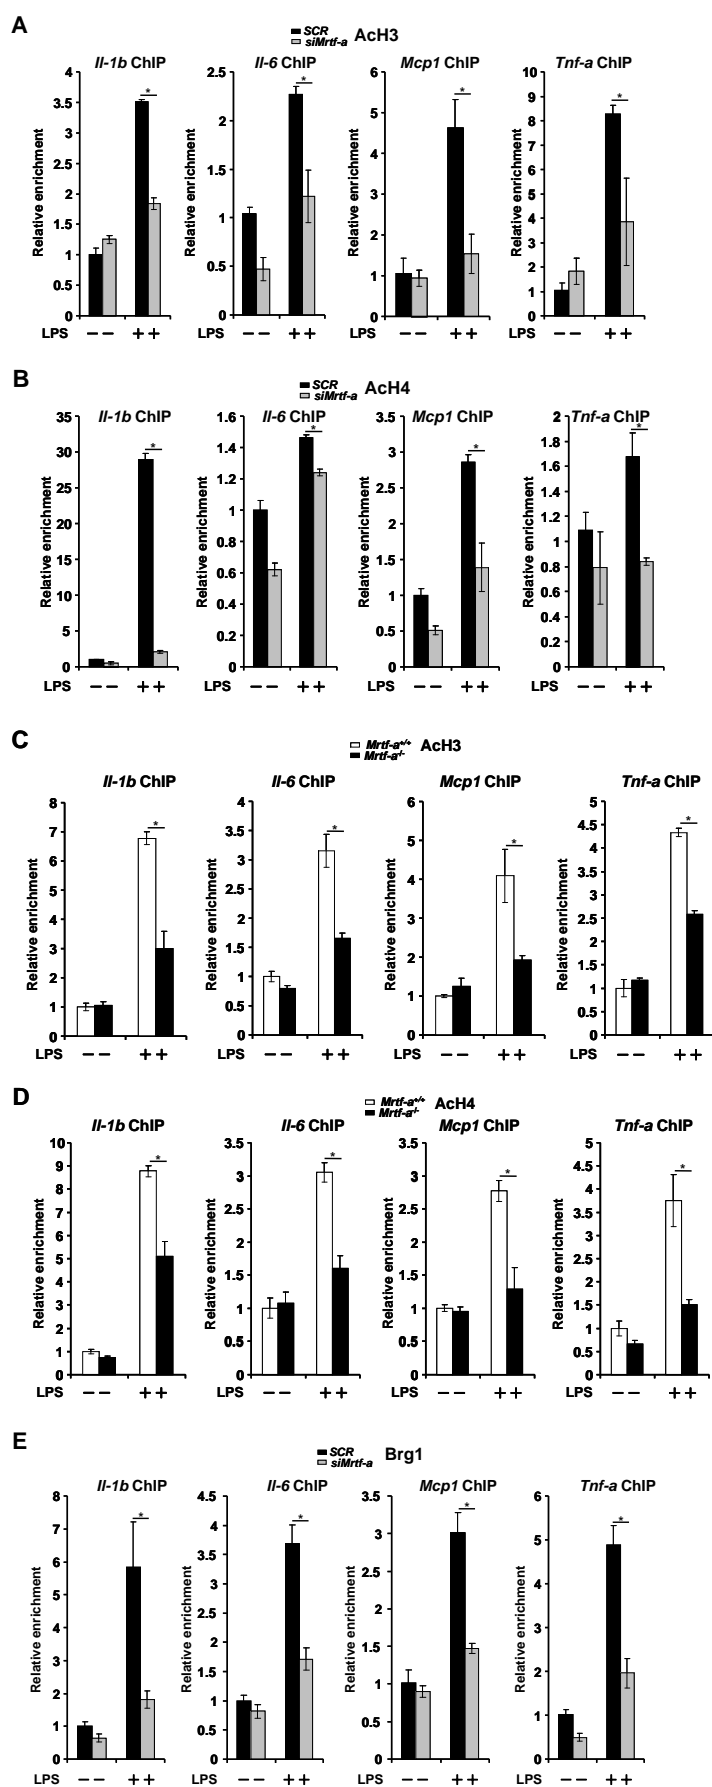

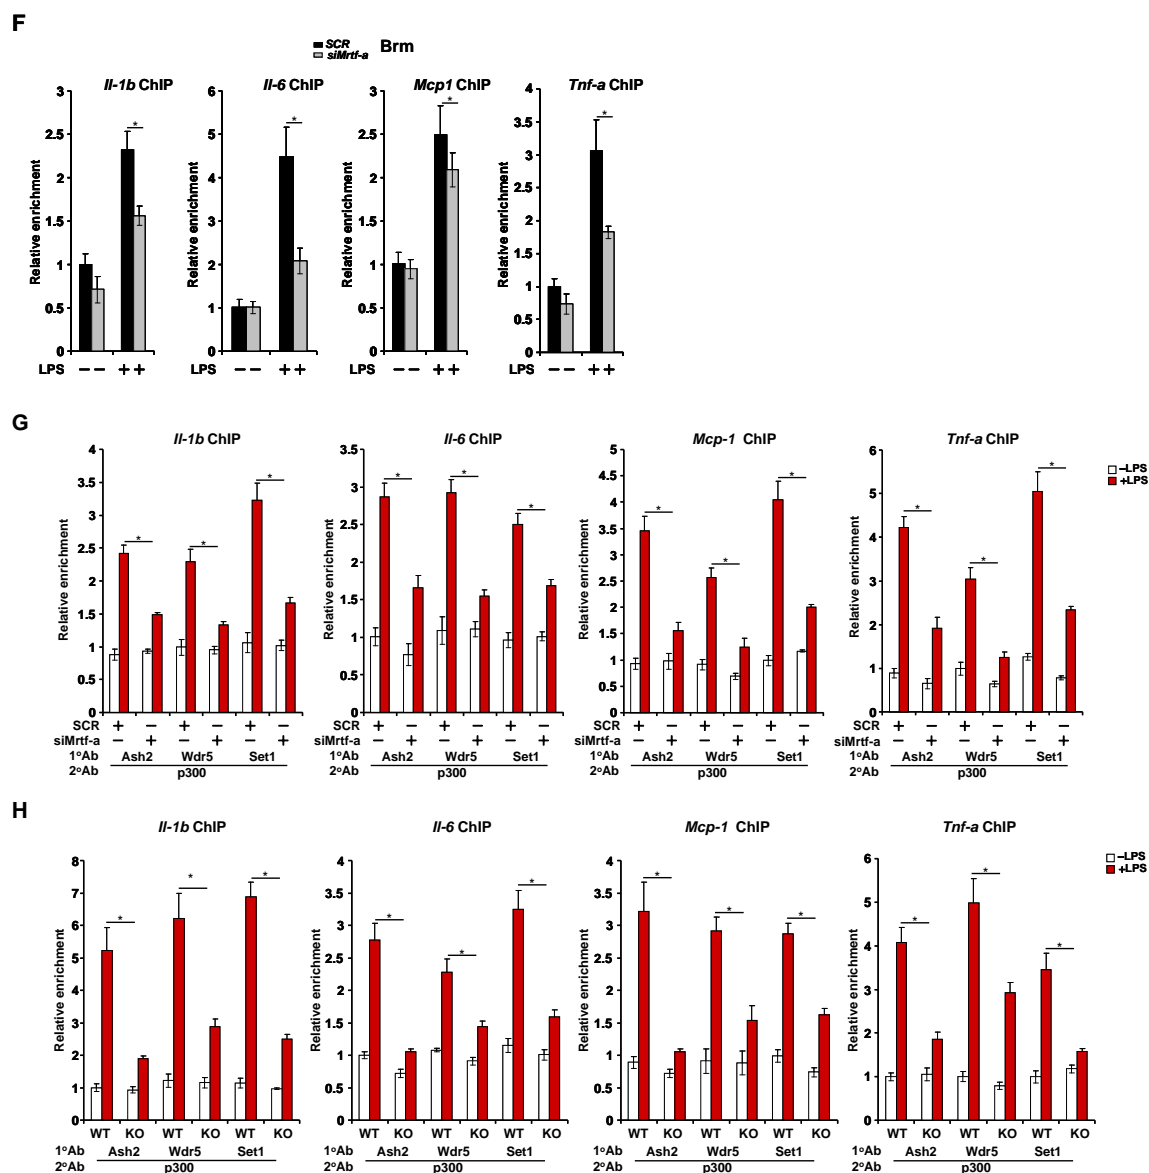

**Fig.S3:** (A, B) RAW264.7 cells were transfected with indicated siRNAs followed by treatment with LPS. ChIP assays were performed with anti-acetyl H3 (A) or anti-acetyl H4 (B). (C, D) WT or MRTF-A KO MEF cells were treated with LPS for 3 hours and ChIP assay was performed with anti-acetyl H3 (C) or anti-acetyl H4 (D). (E, F) RAW264.7 cells were transfected with indicated siRNAs followed by treatment with LPS. ChIP assays were performed with anti-Brg1 (E) or anti-Brm (F). (G) RAW264.7 cells were transfected with indicated siRNAs followed by treatment with LPS. Re-ChIP assays were performed with indicated antibodies. (H) WT or MRTF-A KO MEF cells were treated with LPS for 3 hours. Re-ChIP assays were performed with indicated antibodies. \*,  $p < .05$ . All quantitative data show the mean  $\pm$  S.D.

**Table 1: siRNA sequences**

|              |                       |
|--------------|-----------------------|
| Mouse Mrtf-a | CATGGAGCTGGTGGAGAAGAA |
| Mouse p65    | UGUGUCCAUUGUCUCACUC   |
| Mouse Ash2   | CGAGTCTTGTTAGCCCTACAT |
| Mouse Wdr5   | GCCGTTCAATTCAACCGTGAT |
| Mouse Set1   | CAGCATATTATGAAAGCTGGA |

**Table 2: ChIP Real-time qPCR primers**

|                   |                                          |
|-------------------|------------------------------------------|
| Mouse Il-1        | Forward: 5'-AACGGAGGAGCCGTTGATATG -3'    |
|                   | Reverse: 5'-AGAGCATCTTCCTAATGC-3'        |
| Mouse Il-1 intron | Forward: 5'-AACGTCTGTGTCCGTGTG-3'        |
|                   | Reverse: 5'-ACTCTATCCAGGGATTTAG-3'       |
| Mouse Il-6        | Forward: 5'- AGCTCATTCTGCTCTG-3'         |
|                   | Reverse: 5'-AGATTGCACAATGTGACGTCG-3'     |
| Mouse Il-6 intron | Forward: 5'-AAGGTCAGACTAGACTGTG-3'       |
|                   | Reverse: 5'-ATCCCCACCTAAGAACGAATAG-3'    |
| Mouse Mcp-1       | Forward: 5'-CGTGGGAAAATCCAGTATTTTAATG-3' |
|                   | Reverse: 5'-CAAATGTATCACCATGCAAATATGC-3' |
| Mouse Tnf         | Forward: 5'-TGAGTTGATGTACCGCAGTCAAGA-3'  |
|                   | Reverse: 5'-AGAGCAGCTTGAGAGTTGGGAAGT-3'  |
| Mouse Cxcl2       | Forward: 5'-CAACAGTGTACTTACGCAGACG-3'    |
|                   | Reverse: 5'-CTAGCTGCCTGCCTCATTCTAC-3'    |
